# Supplementary material
Source: ML conference proceedings conference paper supplement (https://openreview.net/forum?id=A-kny8CXTU)
Supplement: supplementary_material [file attachment]

---

# Appendix: Information-Aware Graph Contrastive Learning

---

Anonymous Author(s)

Affiliation

Address

email

## 1 Comparison of Graph Contrastive Learning Approaches

2 We summarize the published approaches of graph contrastive learning in Table 1. Specifically, the  
 3 tasks include graph-level and node-level tasks. The GNNs are used to encode the graph data and  
 4 they are quite flexible. A typical augmented view is the graph itself, but it focuses on different  
 5 structure-level of the graph. The two views adopted by mvgrl are the graph itself and the diffused  
 6 graph, respectively. The four views used by GraphCL are discussed in the text. GCA applies edges  
 7 removing and attribute masking to generate two views. In CSSLs, edge deletion/insertion and node  
 8 deletion/insertion are used to generate different views. Similar to GCA, SelfTask also applies edges  
 9 removing and attribute masking to generate views. The contrastive modes are discussed in the text,  
 10 which include global-global, local-global, local-local, multi-scale mode, and hybrid modes. mvgrl  
 11 studies the effect of various contrastive modes. SelfTask uses both local-local and global-global.  
 12 The additional comparison of sampling strategies and objective functions between published graph  
 13 contrastive learning approaches is shown in Table-2.

| Approach      | Task  | GNN            | Augmented Views | Contrastive Mode |
|---------------|-------|----------------|-----------------|------------------|
| DGI [6]       | Node  | GCN            | Graph itself    | Global-local     |
| InfoGraph [4] | Both  | GIN            | Graph itself    | Multi-scale      |
| mvgrl [1]     | Both  | GCN            | Two views       | Various          |
| GCC [3]       | Both  | GIN            | Graph itself    | Local-local      |
| GRACE [9]     | Node  | GCN, GraphSAGE | Graph itself    | Local-local      |
| GraphCL [7]   | Both  | GCN, GIN, GAT  | Four views      | Global-global    |
| GCA [10]      | Node  | GCN            | Two views       | Local-local      |
| CSSLs [8]     | Graph | HGP-SL         | Four views      | Global-global    |
| SelfTask [2]  | Node  | GCN            | Two views       | Two modes        |

Table 1: A comparison of published approaches for graph contrastive learning.

| Approach      | Sampling Strategy                                                  | Obj. Function |
|---------------|--------------------------------------------------------------------|---------------|
| DGI [6]       | Randomly sampled graphs (or a graph transformation)                | JSD           |
| InfoGraph [4] | Global and local patch across all graph instances in a batch       | JSD           |
| mvgrl [1]     | Joint distribution for positive, product of marginals for negative | JSD, InfoNCE  |
| GCC [3]       | Randomly sampled graphs                                            | InfoNCE       |
| GRACE [9]     | Negative samples are all other nodes in the two views              | NT-xent       |
| GraphCL [7]   | N-1 augmented graphs within the same minibatch                     | NT-xent       |
| GCA [10]      | Negative samples are all other nodes in the two views              | InfoNCE       |
| CSSLs [8]     | Randomly sampled graphs                                            | NT-xent       |
| SelfTask [2]  | Randomly sampled edges/attributes                                  | Cross Entropy |

Table 2: Different sampling strategies and objective functions of published approaches for graph contrastive learning.

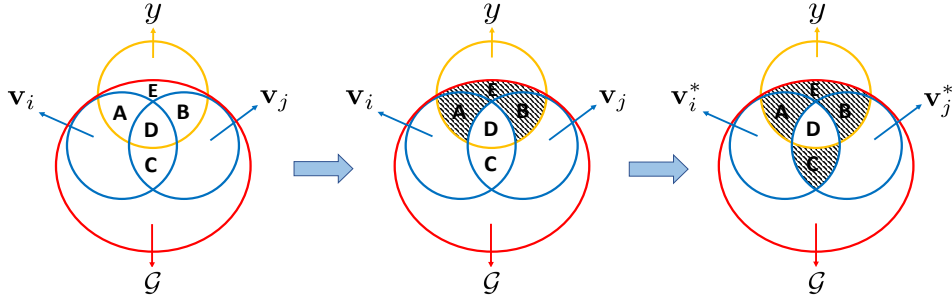

Figure 1: Illustration of optimal views.

## 14 2 Proofs of Corollaries

15 Basically, we follow the proofs in [5] to provide the proofs of our corollaries. The main differences  
 16 are two-fold: 1) the input is graph  $\mathcal{G}$  for our framework, and 2) the concept of optimal contrastive  
 17 mode is unique for graph contrastive learning.

18 **Corollary 1.** (*Optimal Augmented Views*) For a downstream task  $T$  whose goal is to predict a  
 19 semantic label  $y$ , the optimal views,  $\mathbf{v}_i^*$ ,  $\mathbf{v}_j^*$ , generated from the input graph  $\mathcal{G}$  are the solutions to the  
 20 following optimization problem :

$$(\mathbf{v}_i^*, \mathbf{v}_j^*) = \arg \min_{\mathbf{v}_i, \mathbf{v}_j} I(\mathbf{v}_i; \mathbf{v}_j) \quad (1)$$

$$s.t. \quad I(\mathbf{v}_i; y) = I(\mathbf{v}_j; y) \quad (2)$$

$$I(\mathbf{v}_i; y) = I(\mathcal{G}; y) \quad (3)$$

21 *Proof.* Because Equation (3) holds and  $v_i, v_j$  are functions of  $\mathcal{G}$ , it is natural to know  $I(\mathcal{G}; y)$   
 22  $= I(\mathbf{v}_i, \mathbf{v}_j; y)$  holds. Because  $I(\mathbf{v}_i, \mathbf{v}_j; y) = I(\mathbf{v}_i; y) + I(\mathbf{v}_j; y|\mathbf{v}_i)$  and Equation (3) holds, we  
 23 know  $I(\mathbf{v}_i, \mathbf{v}_j; y) = I(\mathcal{G}; y) + I(\mathbf{v}_j; y|\mathbf{v}_i)$ . Because  $I(\mathcal{G}; y) = I(\mathbf{v}_i, \mathbf{v}_j; y)$  already holds and the  
 24 nonnegativity of mutual information, we know

$$I(\mathbf{v}_j; y|\mathbf{v}_i) = 0. \quad (4)$$

25 Thus, we know  $I(\mathbf{v}_i; \mathbf{v}_j) = I(\mathbf{v}_i; \mathbf{v}_j) + I(\mathbf{v}_j; y|\mathbf{v}_i) = I(\mathbf{v}_i, y; \mathbf{v}_j)$ . In addition, we know  $I(\mathbf{v}_i, y; \mathbf{v}_j)$   
 26  $= I(\mathbf{v}_j; y) + I(\mathbf{v}_i; \mathbf{v}_j|y)$ . Thus,  $I(\mathbf{v}_i; \mathbf{v}_j) = I(\mathbf{v}_j; y) + I(\mathbf{v}_i; \mathbf{v}_j|y) \geq I(\mathbf{v}_j; y) = I(\mathcal{G}; y)$ . Therefore,  
 27  $I(\mathbf{v}_i; \mathbf{v}_j)$  can reach the minimum, which is  $I(\mathcal{G}; y)$  And when  $I(\mathbf{v}_i; \mathbf{v}_j)$  can reach the minimum, the  
 28 optimal views are conditionally independent, which is described as

$$I(\mathbf{v}_i^*; \mathbf{v}_j^*|y) = 0. \quad (5)$$

29  $\square$

30 It is noticed that: 1) when Equation (4) holds, the area of B in Figure 1 becomes null. 2) when  
 31 Equation (5) holds, the area of C in Figure 1 becomes null.

32 **Corollary 2.** (*Optimal View Encoder*) Given the optimal views,  $\mathbf{v}_i^*$ ,  $\mathbf{v}_j^*$ , for a downstream task  $T$   
 33 whose goal is to predict a semantic label  $y$ , the optimal view encoder for view  $\mathbf{v}_i^*$  is the solution to  
 34 the following optimization problem :

$$f_i^* = \arg \min_{f_i} I(f_i(\mathbf{v}_i^*); \mathbf{v}_i^*) \quad (6)$$

$$s.t. \quad I(f_i(\mathbf{v}_i^*); \mathbf{v}_j^*) = I(\mathbf{v}_i^*; \mathbf{v}_j^*) \quad (7)$$

35 We can follow the basic idea of Proposition A.2 and Proposition A.3 in Appendix of [5] to get the  
 36 proof of Corollary 2. The main difference is that we focus on the optimal view encoders, however,  
 37 [5] focuses on the optimal representations.

38 **Corollary 3.** (*Optimal Contrastive Mode*) Given the latent representations,  $\mathbf{z}_i^*$ ,  $\mathbf{z}_j^*$ , extracted by the  
 39 optimal view encoders, i.e.,  $\mathbf{z}_i^* = f_i^*(\mathbf{v}_i^*)$ ,  $\mathbf{z}_j^* = f_j^*(\mathbf{v}_j^*)$ , and a downstream task  $T$  with label  $y$ , the  
 40 optimal contrastive mode is the solution to the following optimization problem, where  $c_i, c_j$  are the  
 41 aggregation operations applied to the latent representations:

$$(c_i^*, c_j^*) = \arg \min_{(c_i, c_j)} -I(c_i(\mathbf{z}_i^*); c_j(\mathbf{z}_j^*)). \quad (8)$$

42 *Proof.* Recall the objective function of graph contrastive learning is to minimize the contrastive loss,  
 43 e.g.,  $\mathcal{L}_{NCE}$ . Minimizing the loss equivalently maximizes the mutual information between latent  
 44 representations based on contrastive modes. For example, minimizing  $\mathcal{L}_{NCE}$  equivalently maximizes  
 45  $I(\mathbf{z}_i, \mathbf{z}_j)$ , which is because  $I(\mathbf{z}_i, \mathbf{z}_j) \geq \log(N) - \mathcal{L}_{NCE}$ . Thus, we just need to iterate through all the  
 46 modes and choose the mode with the largest mutual information value.

47

□

### 48 3 Experimental Settings

49 The algorithm of InfoGCL for both graph and node classification is described in Algorithm 1. The  
 50 view augmentation methods include node dropping, edge perturbation, attribute masking, subgraph  
 51 sampling, and graph diffusion. The GNN backbones of view encoders include GCN, GAT, and GIN.  
 52 The aggregation operations include identical transformation and taking average, which construct the  
 53 global-global, local-global, local-local, multi-scale mode, and hybrid modes. It is noticed that the  
 54 two views share the same view encoder (Proposition 2), which is because the domains of the two  
 views are the same.

---

#### Algorithm 1: Training algorithm of InfoGCL for both graph and node classification

---

```

1: Input: The input graph  $\mathcal{G}$ , a task  $T$  with label  $y$ , a bunch of graph view augmentation methods,
    $\{q_1(\cdot), q_2(\cdot), \dots\}$ , a set of view encoders,  $\{f^1(\cdot), f^2(\cdot), \dots\}$ , a set of aggregation operations,
    $\{c_1(\cdot), c_2(\cdot), \dots\}$ .
2: Output: The recommended augmentation methods,  $q_i^*(\cdot), q_j^*(\cdot)$ , the recommended view
   encoder,  $f^*(\cdot)$ , the recommended contrastive mode,  $(c_i^*(\cdot), c_j^*(\cdot))$ .
3: # Proposition 1: optimal view augmentations
4:  $L_a \leftarrow []$ 
5: for view augmentation  $q_i(\cdot) \in \{q_1(\cdot), q_2(\cdot), \dots\}$  do
6:   for view augmentation  $q_j(\cdot) \in \{q_1(\cdot), q_2(\cdot), \dots\}$  do
7:      $\mathbf{v}_i \leftarrow q_i(\mathcal{G})$ 
8:      $\mathbf{v}_j \leftarrow q_j(\mathcal{G})$ 
9:      $\mathbf{a} \leftarrow I(\mathbf{v}_i; y) + I(\mathbf{v}_j; y) - I(\mathbf{v}_i; \mathbf{v}_j)$ .
10:    Add  $\mathbf{a}$  to  $L_a$ .
11:   end for
12: end for
13: Choose the augmentations with the maximum value in  $L_a$  as  $q_i^*(\cdot)$  and  $q_j^*(\cdot)$ , respectively.
14: # Proposition 2: optimal view encoder
15:  $L_b \leftarrow []$ 
16: for view encoder  $f(\cdot) \in \{f^1(\cdot), f^2(\cdot), \dots\}$  do
17:    $\mathbf{z}_i \leftarrow f(\mathbf{v}_i)$ 
18:    $\mathbf{z}_j \leftarrow f(\mathbf{v}_j)$ 
19:    $\mathbf{b} \leftarrow I(\mathbf{v}_i; \mathbf{z}_i; y) + I(\mathbf{v}_j; \mathbf{z}_j; y)$ .
20:   Add  $\mathbf{b}$  to  $L_b$ .
21: end for
22: Choose the encoder with the maximum value in  $L_b$  as  $f^*(\cdot)$ .
23: # Proposition 3: optimal contrastive mode
24:  $L_c \leftarrow []$ 
25: for aggregation operation  $c_i(\cdot) \in \{c_1(\cdot), c_2(\cdot), \dots\}$  do
26:   for aggregation operation  $c_j(\cdot) \in \{c_1(\cdot), c_2(\cdot), \dots\}$  do
27:      $\mathbf{c} \leftarrow I(c_i(\mathbf{z}_i); c_j(\mathbf{z}_j); y)$ .
28:     Add  $\mathbf{c}$  to  $L_c$ .
29:   end for
30: end for
31: Choose the operations with the maximum value in  $L_c$  as  $c_i^*(\cdot)$  and  $c_j^*(\cdot)$ , respectively.

```

---

55

56 **4 Quantitative Evaluation of Proposition**

57 To test the validity of our proposed propositions, we conduct the ablation studies on the Cora and  
 58 Citeseer datasets. Specifically, we use the GraphCL [7] as the backbone and test it on Proposition 1.

59 **Proposition 1.** For a task  $T$  with label  $y$ , given a bunch of graph view augmentation methods,  $\{q_1(\cdot),$   
 60  $q_2(\cdot), \dots\}$ , that create two views  $\mathbf{v}_i, \mathbf{v}_j$ , the recommended augmentation methods are the ones,  $q_i(\cdot),$   
 61  $q_j(\cdot)$ , that maximize  $I(\mathbf{v}_i; y) + I(\mathbf{v}_j; y) - I(\mathbf{v}_i; \mathbf{v}_j)$ , i.e., the area of  $A+B+D$  in Figure 1.

| Augmented Views        | Classification Accuracy |            | $I(\mathbf{v}_i; y) + I(\mathbf{v}_j; y) - I(\mathbf{v}_i; \mathbf{v}_j)$ |                |
|------------------------|-------------------------|------------|---------------------------------------------------------------------------|----------------|
|                        | Cora                    | Citeseer   | Cora                                                                      | Citeseer       |
| EdgePert vs. Identical | 82.5 ± 0.1              | 72.2 ± 0.2 | 4.5671 ± 0.1                                                              | 812.5062 ± 0.6 |
| EdgePert vs. EdgePert  | 82.3 ± 0.2              | 73.1 ± 0.2 | 4.1921 ± 0.4                                                              | 821.3120 ± 1.0 |

Table 3: The comparison between classification accuracy and  $I(\mathbf{v}_i; y)+I(\mathbf{v}_j; y)-I(\mathbf{v}_i; \mathbf{v}_j)$  for different augmented views.  $I(\mathbf{v}_i; y) + I(\mathbf{v}_j; y) - I(\mathbf{v}_i; \mathbf{v}_j)$  is approximated by  $-(CE_i+CE_j-(CE'_i+CE'_j))$ .

62 To calculate  $I(\mathbf{v}_i; y) + I(\mathbf{v}_j; y) - I(\mathbf{v}_i; \mathbf{v}_j)$ , we use cross-entropy to approximate the mutual informa-  
 63 tion. Specifically, we feed  $\mathbf{v}_i$  into GNNs and the outputs are further fed into a MLP to generate logits.  
 64 We calculate the cross-entropy,  $CE_i$ , based on the logits and  $y$ . Similarly, we are able to calculate the  
 65 cross-entropy,  $CE_j$ , based on  $\mathbf{v}_j$  and  $y$ . To approximate  $I(\mathbf{v}_i; \mathbf{v}_j)$ , we first feed  $\mathbf{v}_i, \mathbf{v}_j$  into another  
 66 GNNs and MLP. Then, we use the outputs of  $\mathbf{v}_i$  as logits and the outputs of  $\mathbf{v}_j$  as labels to get  $CE'_i$ .  
 67 Symmetrically, we are able to get  $CE'_j$ . Thus, we use  $-(CE_i + CE_j - (CE'_i + CE'_j))$  to approximate  
 68  $I(\mathbf{v}_i; y) + I(\mathbf{v}_j; y) - I(\mathbf{v}_i; \mathbf{v}_j)$ . We use two-layer GCNs as the GNNs and  $CE_i + CE_j - (CE'_i + CE'_j)$   
 69 as the loss function. We adopt the default settings and train the model until it converges. The results  
 70 are reported in Table 3. It is observed that, on the Cora dataset, the view pair of edge perturbation  
 71 and the graph itself shows a little higher performance than the pair of edge perturbation and edge  
 72 perturbation. According to the right part of Table 3, we see the view pair of edge perturbation and the  
 73 graph itself has a greater value of  $I(\mathbf{v}_i; y) + I(\mathbf{v}_j; y) - I(\mathbf{v}_i; \mathbf{v}_j)$  than the pair of edge perturbation  
 74 and edge perturbation. Similar observations can be observed on the Citeseer dataset. Thus, the  
 75 validity of Proposition 1 is verified.

76 **References**

- 77 [1] Kaveh Hassani and Amir Hosein Khasahmadi. Contrastive multi-view representation learning  
78 on graphs. In *ICML*, pages 3451–3461. 2020.
- 79 [2] Wei Jin, Tyler Derr, Haochen Liu, Yiqi Wang, Suhang Wang, Zitao Liu, and Jiliang Tang.  
80 Self-supervised learning on graphs: Deep insights and new direction. *arXiv preprint*  
81 *arXiv:2006.10141*, 2020.
- 82 [3] Jiezhong Qiu, Qibin Chen, Yuxiao Dong, Jing Zhang, Hongxia Yang, Ming Ding, Kuansan  
83 Wang, and Jie Tang. Gcc: Graph contrastive coding for graph neural network pre-training.  
84 *KDD*, 2020.
- 85 [4] Fan-Yun Sun, Jordan Hoffman, Vikas Verma, and Jian Tang. Infograph: Unsupervised and  
86 semi-supervised graph-level representation learning via mutual information maximization. In  
87 *ICLR*, 2019.
- 88 [5] Yonglong Tian, Chen Sun, Ben Poole, Dilip Krishnan, Cordelia Schmid, and Phillip Isola. What  
89 makes for good views for contrastive learning. In *NeurIPS*, volume 33, 2020.
- 90 [6] Petar Veličković, William Fedus, William L. Hamilton, Pietro Liò, Yoshua Bengio, and R Devon  
91 Hjelm. Deep Graph Infomax. In *ICLR*, 2019.
- 92 [7] Yuning You, Tianlong Chen, Yongduo Sui, Ting Chen, Zhangyang Wang, and Yang Shen.  
93 Graph contrastive learning with augmentations. In *NeurIPS*, volume 33, 2020.
- 94 [8] Jiaqi Zeng and Pengtao Xie. Contrastive self-supervised learning for graph classification. *arXiv*  
95 *preprint arXiv:2009.05923*, 2020.
- 96 [9] Yanqiao Zhu, Yichen Xu, Feng Yu, Qiang Liu, Shu Wu, and Liang Wang. Deep Graph  
97 Contrastive Representation Learning. In *ICML Workshop*, 2020.
- 98 [10] Yanqiao Zhu, Yichen Xu, Feng Yu, Qiang Liu, Shu Wu, and Liang Wang. Graph contrastive  
99 learning with adaptive augmentation. *arXiv preprint arXiv:2010.14945*, 2020.
